# Supplementary material for: A pillar[5]arene-based planar chiral charge-transfer dye with enhanced circularly polarized luminescence and multiple responsive chiroptical changes
Source: Royal Society of Chemistry journal article supplement (doi:10.1039/d2sc06000k), 2023-01-01
Supplement: d2sc06000k1.pdf [file d2sc06000k1.pdf]

# Pillar[5]arene-based planar chiral charge-transfer dye with enhanced circularly polarized luminescence and multiple responsive chiroptical changes

Jin-Fa Chen,\* Qing-Xiu Gao, Lijie Liu, Pangkuan Chen and Tai-Bao Wei

*Key Laboratory of Eco-Environment-Related Polymer Materials, Ministry of Education of China; Key Laboratory of Polymer Materials of Gansu Province; College of Chemistry and Chemical Engineering, Northwest Normal University, Lanzhou, Gansu 730070, P. R. China.*

\*chenjinfa@nwnu.edu.cn

## Table of Contents

|                                                  |     |
|--------------------------------------------------|-----|
| 1. Experimental Section                          | S2  |
| 2. Synthetic Procedures                          | S4  |
| 3. Characterization by NMR and HRMS Spectroscopy | S6  |
| 4. X-ray Structure Determination                 | S10 |
| 5. Photophysical Measurements                    | S11 |
| 6. DFT and TD-DFT Computations                   | S13 |
| 7. Electrochemical Measurements                  | S15 |
| 8. Chiral HPLC Trace Analysis                    | S16 |
| 9. Host–Guest Recognition                        | S17 |
| 10. Anion Recognition                            | S19 |
| 11. Coordinates (Å) for the Optimized Structures | S21 |
| 12. References                                   | S24 |

## 1. Experimental Section

**Materials and Methods:** 1,4-Phenylenediboronic acid, Pd(PPh<sub>3</sub>)<sub>4</sub>, PPh<sub>3</sub>, K<sub>2</sub>CO<sub>3</sub> and K<sub>3</sub>PO<sub>4</sub> were purchased from Energy Chemical. Dichloromethane, petroleum ether, hexane, ethanol, toluene, 1,4-dioxane, acetone and ethyl acetate were purchased from Sinopharm Chemical Reagent Co., Ltd.

400 MHz <sup>1</sup>H, 101 MHz <sup>13</sup>C, and 225 MHz <sup>11</sup>B NMR spectra were recorded on a Bruker spectrometer. <sup>11</sup>B NMR spectra were acquired with boron-free quartz NMR tubes and the spectra were referenced externally to BF<sub>3</sub>·Et<sub>2</sub>O ( $\delta = 0$ ). High resolution mass spectral data were obtained *via* ESI on an Agilent (Q-TOF 6520) analyzer.

Dissolve 5 mg **P5BB** in acetone (0.5mL)/methanol (0.5 mL) solvent, then slowly evaporate at room temperature to get colorless bulk crystals. Single crystal X-ray data were obtained on a Bruker D8 X-ray single crystal Venture diffractometer using Mo K $\alpha$  radiation ( $\lambda = 0.71073 \text{ \AA}$ ). SAINT5.0 and SADABS programs are used for the reduction and absorption correction of crystal data. The resolution and refinement of the crystal structure are obtained on the SHELXTL-97 software. Using the direct or Patterson methods, all non-hydrogen source coordinates are obtained by using the differential Fourier method and the least square method. Then the geometric method and the difference value are used. The hydrogen atom coordinates were obtained by Fourier method, and the crystal structure was obtained. The CCDC number of 2215838 (**P5BB**) is deposited.

UV-visible absorption spectra were recorded on a Cary 300 UV-Vis spectrophotometer. The fluorescence spectra were recorded on a Lengguang Tech F97 Pro spectrophotometer. The fluorescence lifetime data was measured on an Edinburgh Instruments FLS980 spectrophotometer. Fluorescent quantum efficiencies were determined using a Hamamatsu Quantaaurus-QY spectrometer (C11347-11). The CD spectra were measured using a Circular Dichroism spectrometer (J-1500, Jasco). CPL measurements were performed with circularly polarized luminescence spectrometer (CPL-300, Jasco). In the spectral tests, the solid-state samples involved here are amorphous.

Electrochemical measurements were conducted on an AUTOLAB-CV-75W analyzer with a scan rate of 100 mV/s. The electrochemical cell was a standard three-compartment cell composed of a glass carbon working electrode, a Pt auxiliary electrode, and a Pt wire

reference electrode. All tests were performed using  $[\text{Bu}_4\text{N}][\text{PF}_6]$  (0.1 M) as the supporting electrolyte. The voltammograms were obtained in anhydrous and nitrogen-saturated  $\text{CH}_2\text{Cl}_2$  or THF solutions. The potentials are reported relative to the ferrocene/ferrocenium couple.

For titration experiments, fluorine ion solutions were prepared by dissolving the desired amount of solid  $\text{TBAF}\cdot 3\text{H}_2\text{O}$  in THF. Addition of fluorine ion to the sample solution was performed by a microsyringe ( $\pm 0.1 \mu\text{L}$ ). Solutions of anions were prepared from the tetrabutylammonium salts of  $\text{Cl}^-$ ,  $\text{Br}^-$ , and  $\text{I}^-$ .

DFT calculations were performed with the Gaussian 09 program. Geometry optimizations and vertical excitations were calculated by means of hybrid density functional B3LYP with the basis set of 6-31G(d,p). The input files and orbital representations were generated with Gaussview 5.0 (scaling radii of 75%, isovalue = 0.02). Excitation data were calculated using TD-DFT (B3LYP/6-31G(d)). The resulting structures were confirmed to be stationary points through vibrational frequency analysis.

## 2. Synthetic Procedures

### 2.1 Synthetic route of P5BB

Starting material **P5-OTf**<sup>[S1]</sup> and (4-(dimesitylboranyl) phenyl)boronic acid<sup>[S2]</sup> were prepared according to the literature procedures.

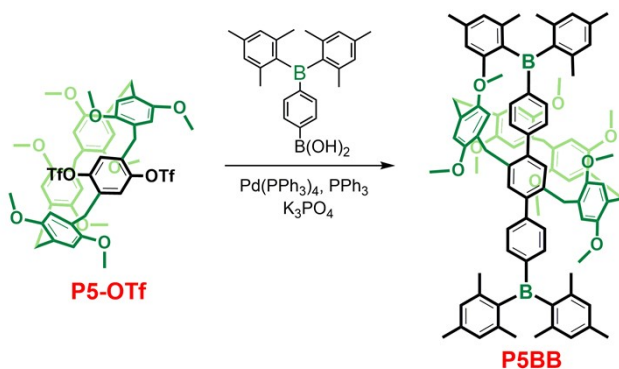

**P5BB:** The mixture of **P5-OTf** (196 mg, 0.2 mmol), (4-(dimesitylboranyl) phenyl)boronic acid (222 mg, 0.6 mmol), Pd(PPh<sub>3</sub>)<sub>4</sub> (23 mg, 0.02 mmol), PPh<sub>3</sub> (13 mg, 0.05 mmol) and K<sub>3</sub>PO<sub>4</sub> (106 mg, 0.5 mmol) in 1,4-dioxane/H<sub>2</sub>O (4 mL/1 mL) was refluxed in an oil bath with stirring under N<sub>2</sub> for 72 h. The reaction mixture was then cooled to room temperature and poured into water (30 mL). After extraction with CH<sub>2</sub>Cl<sub>2</sub>, the combined organic phases were dried over Na<sub>2</sub>SO<sub>4</sub>. Purification by column chromatography on silica gel (petroleum ether/CH<sub>2</sub>Cl<sub>2</sub>/ethyl acetate = 100:1:2, v/v/v) gave **P5BB** as a white solid (120 mg, 45%). <sup>1</sup>H NMR (400 MHz, CDCl<sub>3</sub>) δ 7.54 (d, *J* = 7.9 Hz, 4H), 7.29 (s, 2H), 7.20 (d, *J* = 7.9 Hz, 4H), 6.85 (s, 8H), 6.75 (s, 2H), 6.68 (s, 2H), 6.60 (s, 2H), 5.86 (s, 2H), 3.90–3.89 (m, 4H), 3.80 (s, 2H), 3.75–3.65 (m, 4H), 3.59 (s, 6H), 3.56 (s, 6H), 3.48 (s, 6H), 3.26 (s, 6H), 2.33 (s, 12H), 2.07 (s, 24H). <sup>13</sup>C NMR (101 MHz, CDCl<sub>3</sub>) δ 151.1, 150.9, 150.7, 149.9, 146.4, 141.7, 140.8, 140.3, 138.7, 136.4, 136.3, 132.7, 129.4, 129.1, 128.6, 128.6, 128.2, 127.9, 122.7, 114.2, 114.1, 113.9, 55.9, 55.9, 55.8, 55.5, 32.3, 30.2, 23.5, 21.2, 20.4, 15.8. <sup>11</sup>B NMR (225 MHz, CDCl<sub>3</sub>) δ 70 ppm. ESI-HRMS (*m/z*): calcd. for C<sub>91</sub>H<sub>100</sub>B<sub>2</sub>NO<sub>8</sub> [M+NH<sub>4</sub>]<sup>+</sup> 1356.7635, found 1356.7645.

### 2.2 Synthetic route of PhBB

Starting material (4-bromophenyl)dimesitylborane<sup>[S3]</sup> was prepared according to the literature procedures.

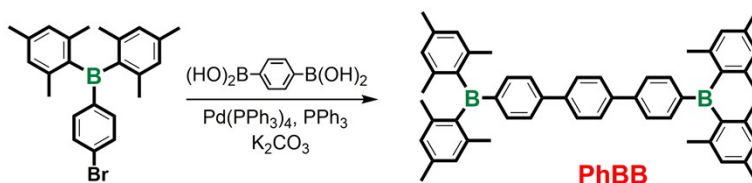

**PhBB:** The mixture of (4-bromophenyl)dimesitylborane (108 mg, 0.25 mmol), 1,4-phenylenediboronic acid (16.5 mg, 0.1 mmol), Pd(PPh<sub>3</sub>)<sub>4</sub> (23 mg, 0.02 mmol), PPh<sub>3</sub> (13 mg, 0.05 mmol) and K<sub>2</sub>CO<sub>3</sub> (138 mg, 1.0 mmol) in toluene/EtOH/H<sub>2</sub>O (4 mL/0.5 mL/0.5 mL) was refluxed in an oil bath with stirring under N<sub>2</sub> for 48 h. The reaction mixture was then cooled to room temperature and poured into water (30 mL). After extraction with CH<sub>2</sub>Cl<sub>2</sub>, the combined organic phases were dried over Na<sub>2</sub>SO<sub>4</sub>. Purification by column chromatography on silica gel (petroleum ether/ethyl acetate = 200:1, v/v) gave **PhBB** as a white solid (28 mg, 38%). <sup>1</sup>H NMR (400 MHz, CDCl<sub>3</sub>) δ 7.73 (s, 4H), 7.64–7.59 (m, 8H), 6.84 (s, 8H), 2.32 (s, 12H), 2.04 (s, 24H). <sup>13</sup>C NMR (101 MHz, CDCl<sub>3</sub>) δ 144.7, 143.7, 141.7, 140.8, 140.0, 138.6, 137.1, 128.2, 127.6, 126.4, 23.5, 21.2. <sup>11</sup>B NMR (225 MHz, CDCl<sub>3</sub>) δ 75 ppm.

### 3. Characterization by NMR and HRMS Spectroscopy

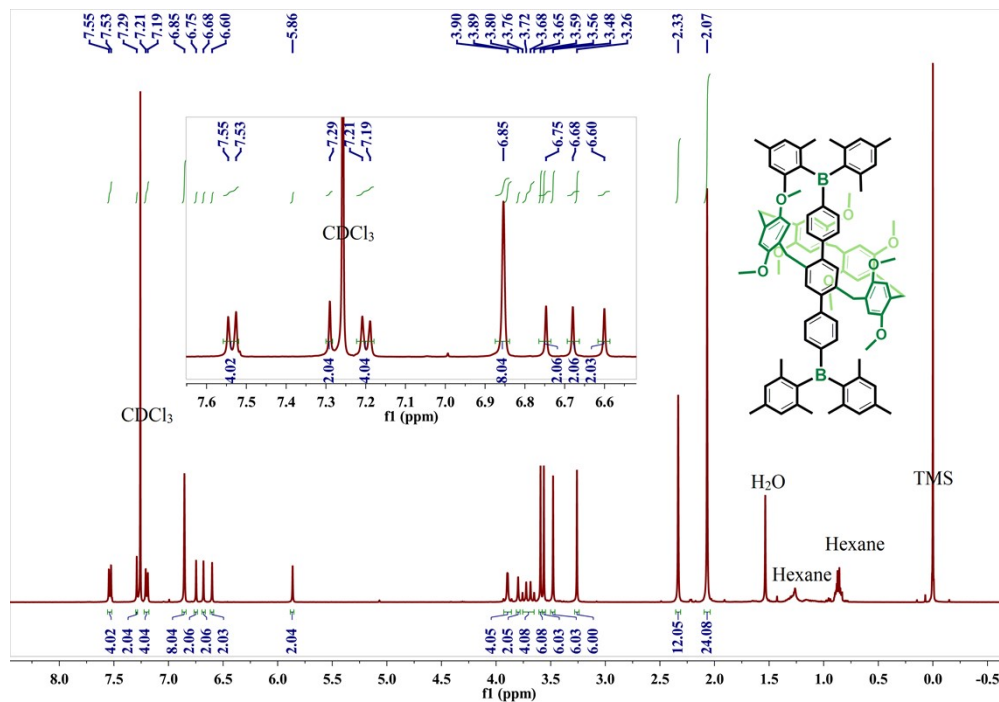

Figure S1. <sup>1</sup>H NMR (400 MHz, CDCl<sub>3</sub>) spectrum of P5BB.

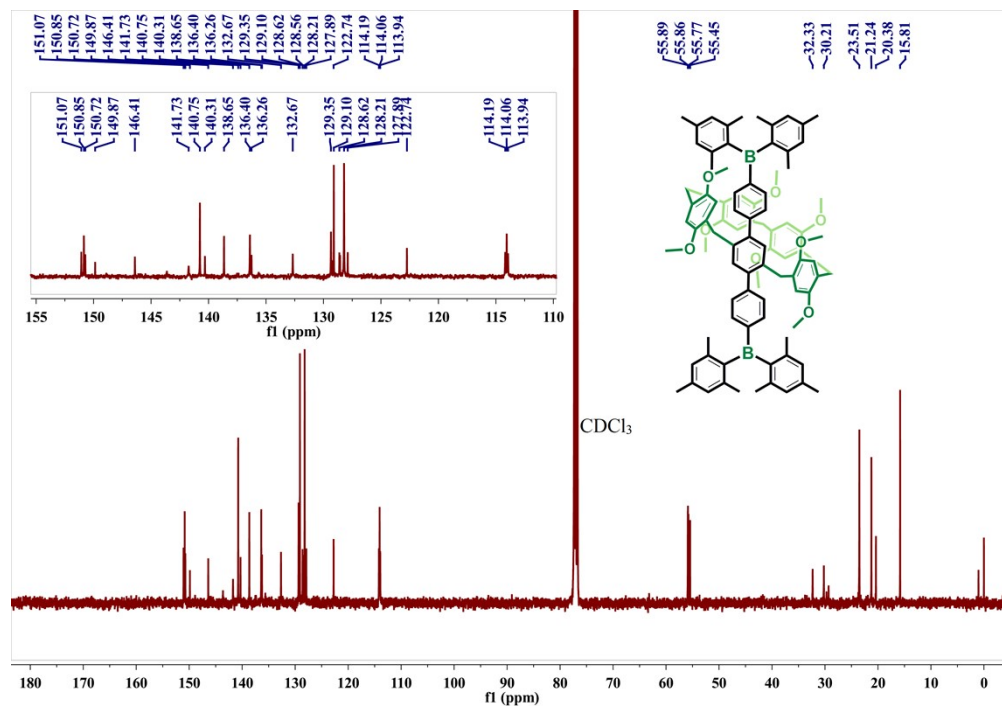

Figure S2. <sup>13</sup>C NMR (101 MHz, CDCl<sub>3</sub>) spectrum of P5BB.

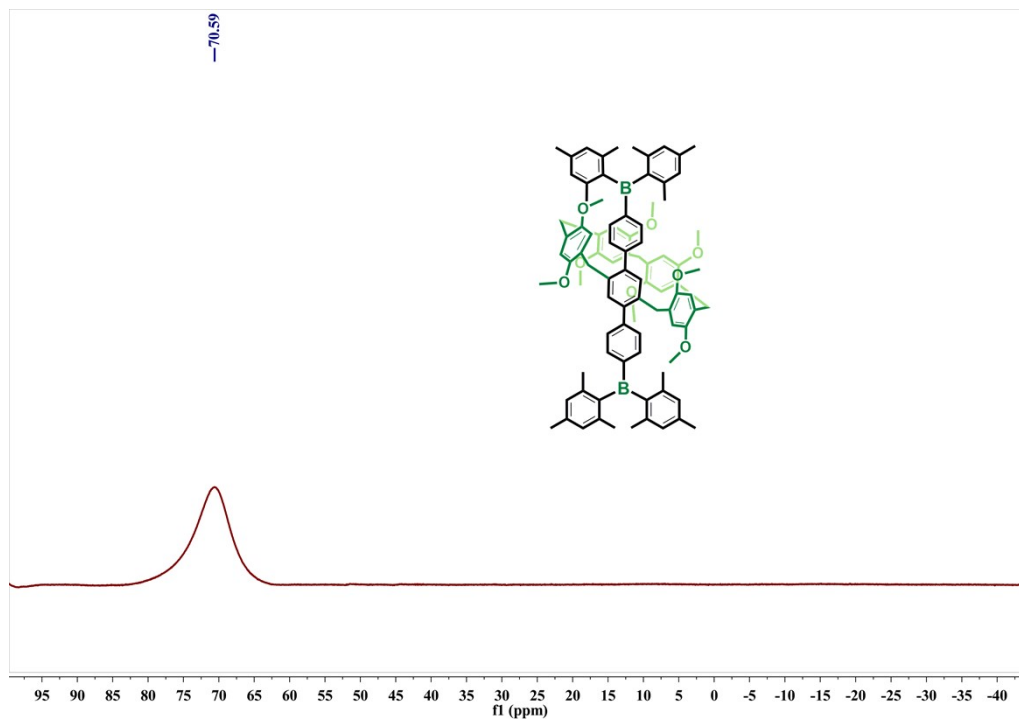

**Figure S3.**  $^{11}\text{B}$  NMR (225 MHz,  $\text{CDCl}_3$ ) spectrum of **P5BB**.

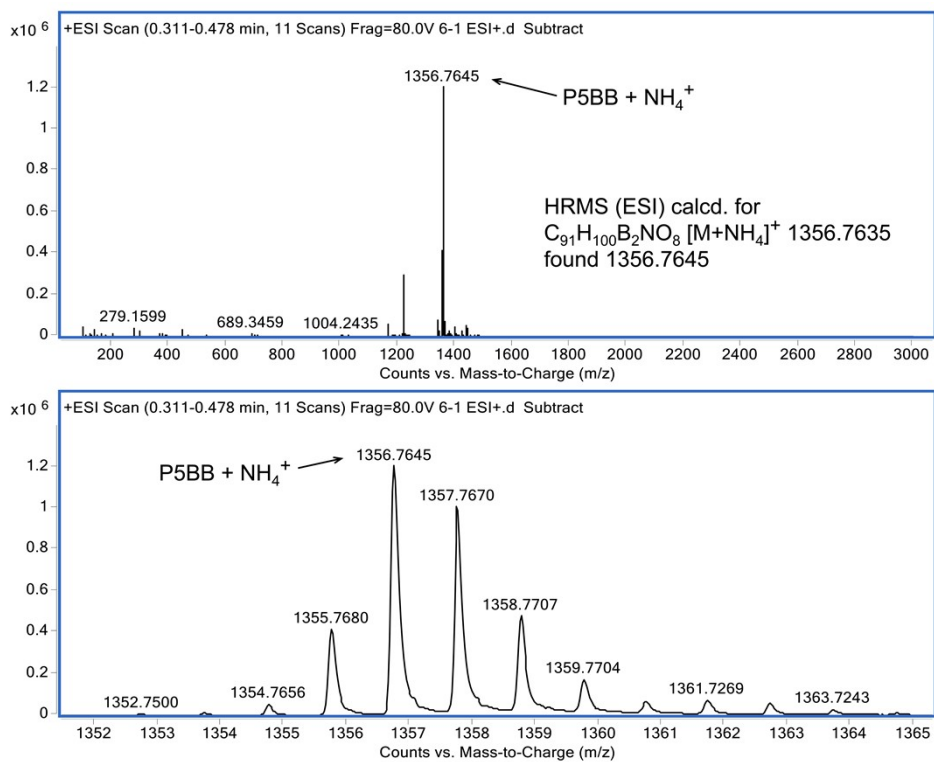

**Figure S4.** HRMS spectrum for **P5BB**.

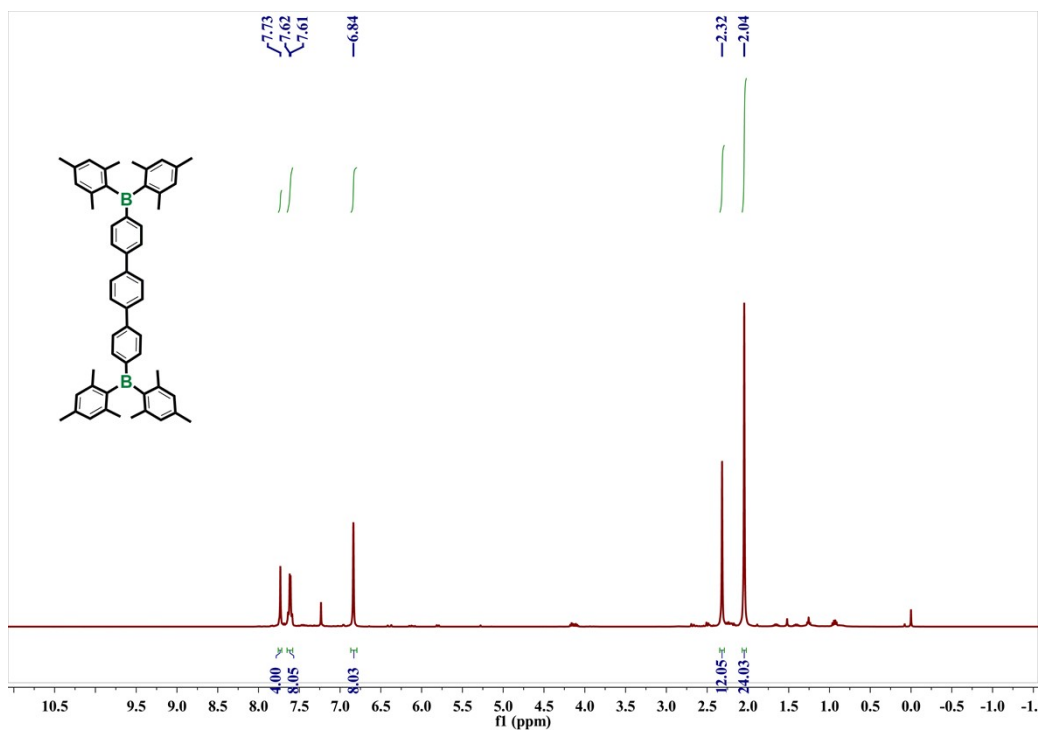

Figure S5.  $^1\text{H}$  NMR (400 MHz,  $\text{CDCl}_3$ ) spectrum of PhBB.

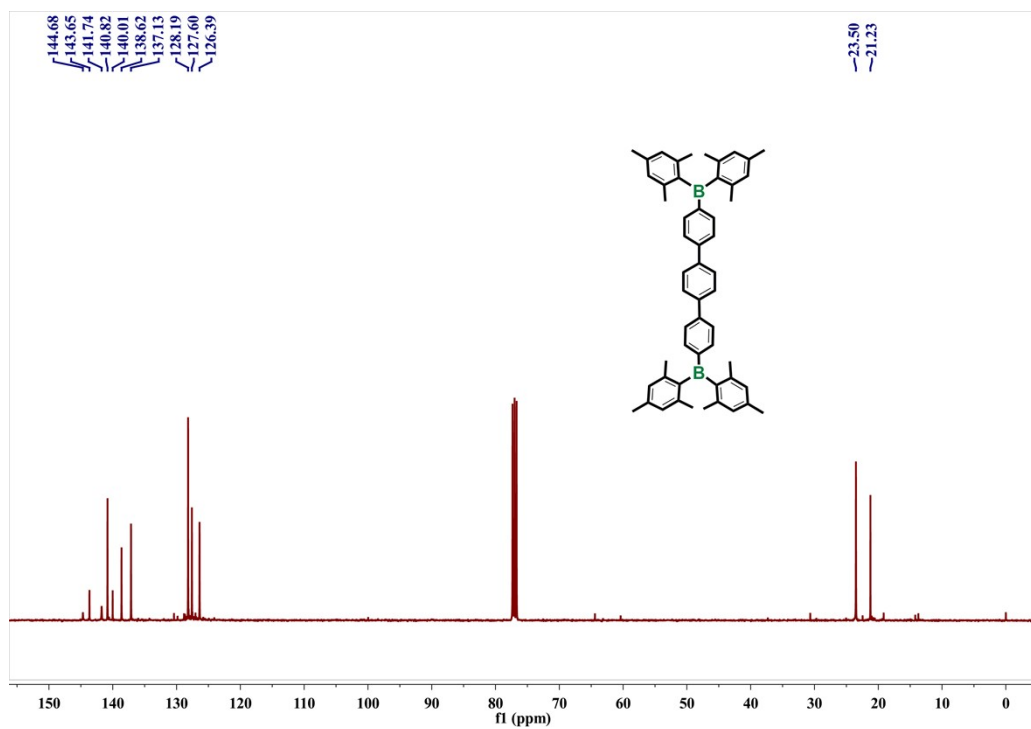

Figure S6.  $^{13}\text{C}$  NMR (101 MHz,  $\text{CDCl}_3$ ) spectrum of PhBB.



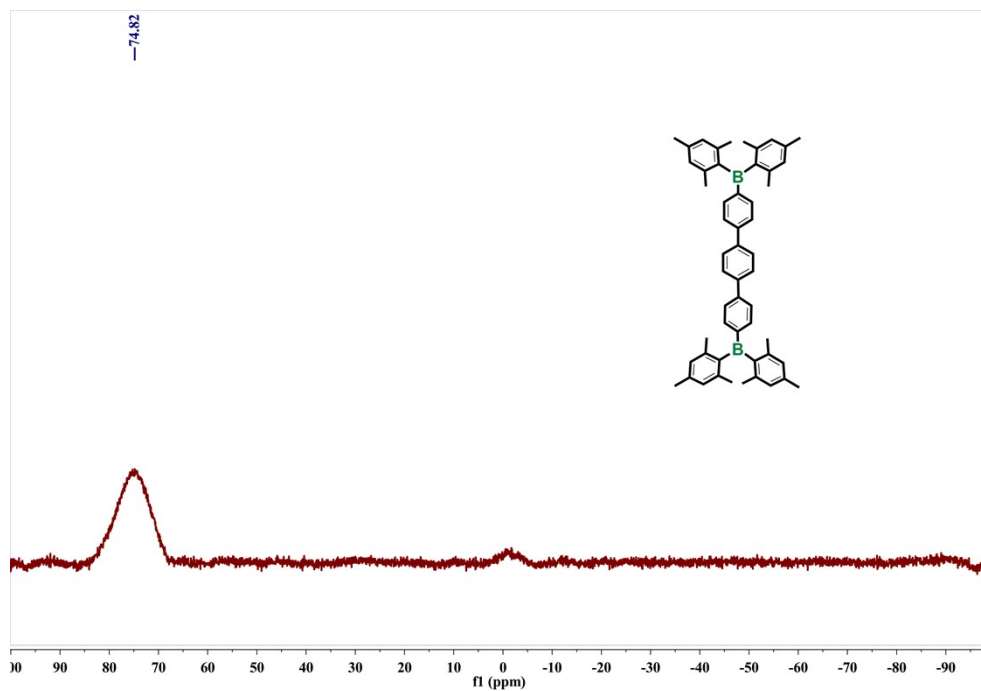

**Figure S7.**  $^{11}\text{B}$  NMR (225 MHz,  $\text{CDCl}_3$ ) spectrum of **PhBB**.

## 4. X-ray Structure Determination

**Table S1.** Crystallographic data and structure refinement for **P5BB**.

| Compound                                      | <i>Rac</i> - <b>P5BB</b>                                                                                         |
|-----------------------------------------------|------------------------------------------------------------------------------------------------------------------|
| Empirical formula                             | C <sub>97</sub> H <sub>106</sub> B <sub>2</sub> NO <sub>10</sub>                                                 |
| Formula weight                                | 1453.43                                                                                                          |
| Temperature/K                                 | 180.0                                                                                                            |
| Crystal system                                | monoclinic                                                                                                       |
| Space group                                   | P2 <sub>1</sub> /n                                                                                               |
| Unit cell                                     | $a = 13.9414(11)$ , $b = 20.9320(17)$ , $c = 28.7875(18)$<br>$\alpha = 90$ , $\beta = 95.848(3)$ , $\gamma = 90$ |
| Volume/Å <sup>3</sup>                         | 8357.1(11)                                                                                                       |
| Z                                             | 4                                                                                                                |
| $\rho_{\text{calc}}$ /cm <sup>3</sup>         | 1.155                                                                                                            |
| $\mu$ /mm <sup>-1</sup>                       | 0.073                                                                                                            |
| F(000)                                        | 3112.0                                                                                                           |
| Crystal size/mm <sup>3</sup>                  | 0.3 × 0.3 × 0.09                                                                                                 |
| Radiation                                     | MoK $\alpha$ ( $\lambda = 0.71073$ )                                                                             |
| 2 $\theta$ range for data collection/°        | 4.69–50                                                                                                          |
| Index ranges                                  | -16 ≤ h ≤ 14, -24 ≤ k ≤ 24, -34 ≤ l ≤ 34                                                                         |
| Reflections collected                         | 83864                                                                                                            |
| Independent reflections                       | 14710 [R <sub>int</sub> = 0.1085, R <sub>sigma</sub> = 0.0727]                                                   |
| Data/restraints/parameters                    | 14710/24/1038                                                                                                    |
| Goodness-of-fit on F <sup>2</sup>             | 0.990                                                                                                            |
| Final R indexes [I ≥ 2 $\sigma$ (I)]          | R <sub>1</sub> = 0.0657, wR <sub>2</sub> = 0.1698                                                                |
| Final R indexes [all data]                    | R <sub>1</sub> = 0.1392, wR <sub>2</sub> = 0.1958                                                                |
| Largest diff. peak/hole (e. Å <sup>-3</sup> ) | 0.39/-0.29                                                                                                       |

**Table S2.** Selected bond distances (Å) from X-ray data for **P5BB**.

| Bond       | Bond Length | Bond       | Bond Length |
|------------|-------------|------------|-------------|
| B(1)-C(1)  | 1.582(4)    | B(2)-C(34) | 1.560(4)    |
| B(1)-C(10) | 1.575(4)    | B(2)-C(37) | 1.563(4)    |
| B(1)-C(19) | 1.562(4)    | B(2)-C(46) | 1.574(4)    |

**Table S3.** Selected bond angles (°) from X-ray data for **P5BB**.

| Bond Angles      |          | Bond Angles      |          |
|------------------|----------|------------------|----------|
| C(1)-B(1)-C(10)  | 121.2(2) | C(34)-B(2)-C(37) | 120.2(2) |
| C(1)-B(1)-C(19)  | 117.8(2) | C(34)-B(2)-C(46) | 116.2(2) |
| C(10)-B(1)-C(19) | 120.9(3) | C(37)-B(2)-C(46) | 123.6(2) |

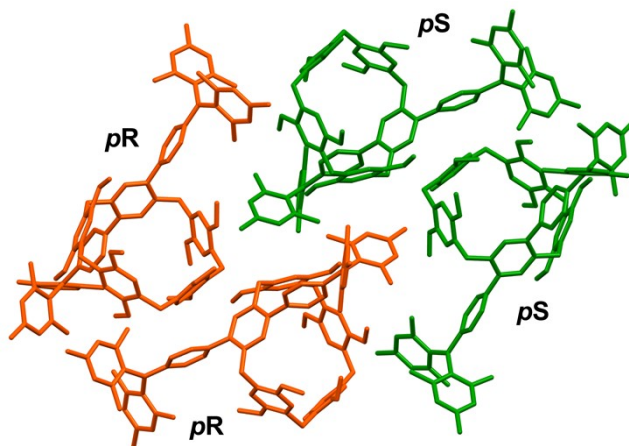

**Figure S8.** X-ray crystal stacks in *rac*-P5BB via C–H··· $\pi$ , C–H···O and C–H···C interactions. Enantiomers are highlighted in different colors. All the hydrogen atoms and solvent molecules are removed for clarity.

## 5. Photophysical Measurements

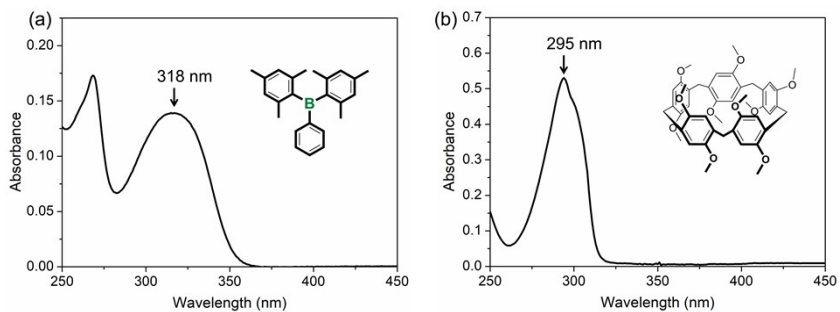

**Figure S9.** UV-vis absorption spectra of (a) triarylborane and (b) DMP5 in THF ( $c = 1.0 \times 10^{-5}$  M).

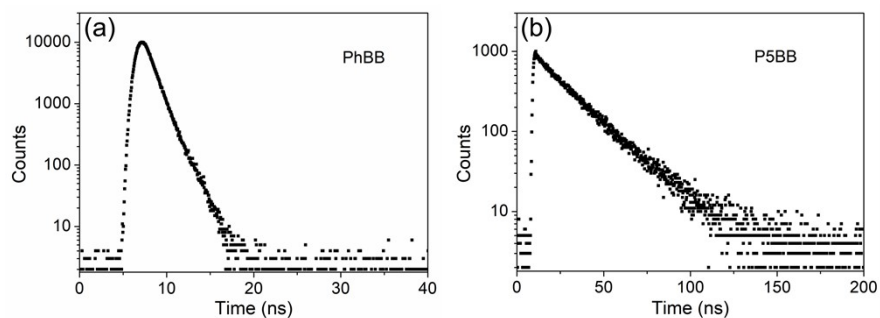

**Figure S10.** Transient photoluminescence decay spectra of (a) PhBB and (b) P5BB in THF ( $c = 1.0 \times 10^{-5}$  M) at room temperature.

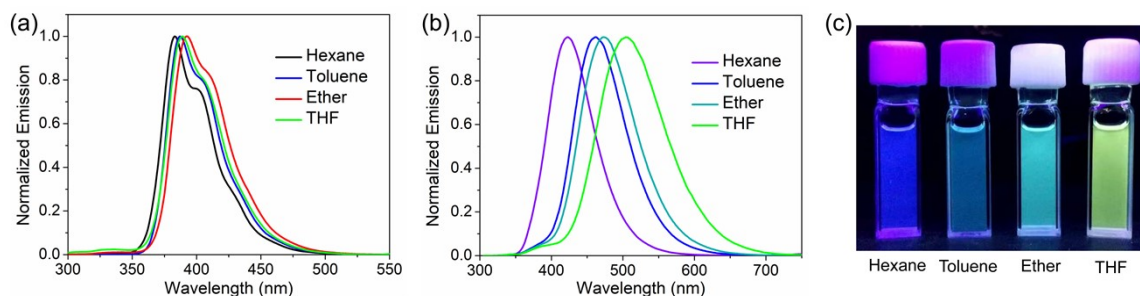

**Figure S11.** Emission spectra of (a) **PhBB** ( $\lambda_{\text{ex}} = 345 \text{ nm}$ ) and (b) **P5BB** ( $\lambda_{\text{ex}} = 306 \text{ nm}$ ) in different solvents ( $c = 1.0 \times 10^{-5} \text{ M}$ ) with different polarity; (c) Photographs showing the emission colors of **P5BB** in different solvents under the 365 nm UV lamp.

**Table S4.** Emission wavelength ( $\lambda_{\text{em}}$ ) and fluorescence quantum yield ( $\Phi$ ) of **P5BB** in different solvents ( $c = 1.0 \times 10^{-5} \text{ M}$ ) with different polarity.

|                            | Hexane | Toluene | Ether | THF |
|----------------------------|--------|---------|-------|-----|
| $\lambda_{\text{em}}$ (nm) | 422    | 460     | 473   | 510 |
| $\Phi$ (%)                 | 33     | 24      | 23    | 12  |

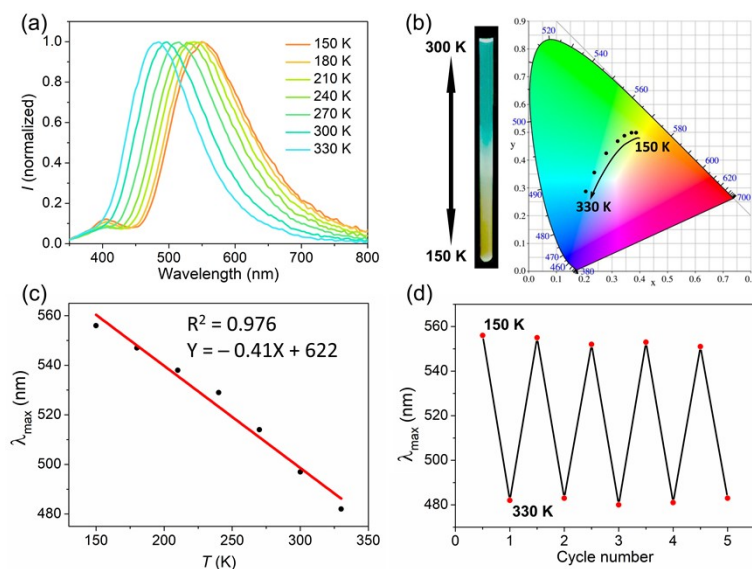

**Figure S12.** a) Temperature-dependent emission spectra of *rac*-**P5BB** recorded in 2-methyltetrahydrofuran between 150 and 330 K ( $c = 2.0 \times 10^{-5} \text{ M}$ ,  $\lambda_{\text{ex}} = 306 \text{ nm}$ ); b) Photograph shown in an NMR tube and CIE color coordinates; (c) Data fitting of the emission ( $\lambda_{\text{max}}$ ) dependence on temperature ( $T$ ) for *rac*-**P5BB**, and d) reversible emission modulation with cycling  $T$  changes for *rac*-**P5BB**.

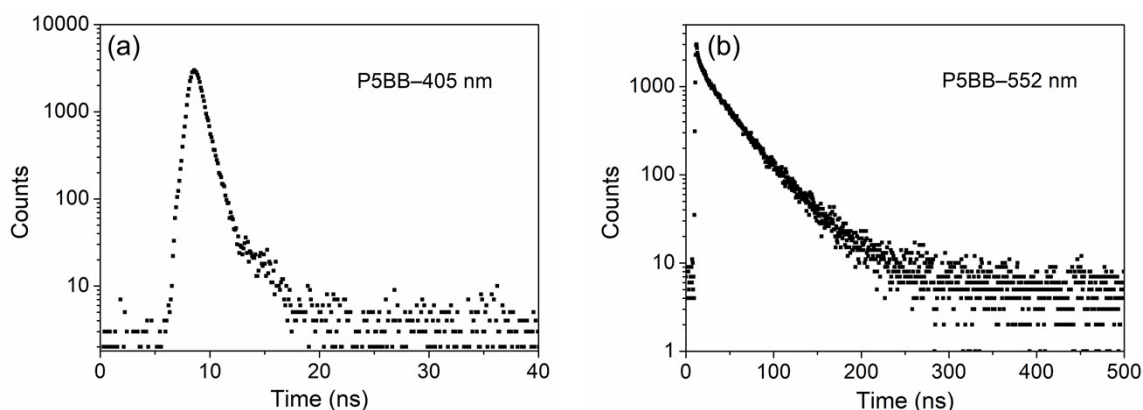

**Figure S13.** Transient photoluminescence decay spectra for different emission bands of **P5BB** in 2-methyltetrahydrofuran ( $c = 2.0 \times 10^{-5}$  M) at 150 K.

## 6. DFT and TD-DFT Computations

DFT and TD-DFT calculations were performed using the Gaussian 09 suite of programs.<sup>[S4]</sup> Geometry optimizations and vertical excitations were obtained at the (DFT)B3LYP/6-31G(d,p) and (TD-DFT)B3LYP/6-31G(d) level of theory,<sup>[S5,S6]</sup> and the resulting structures were confirmed to be stationary points through vibrational frequency analysis.

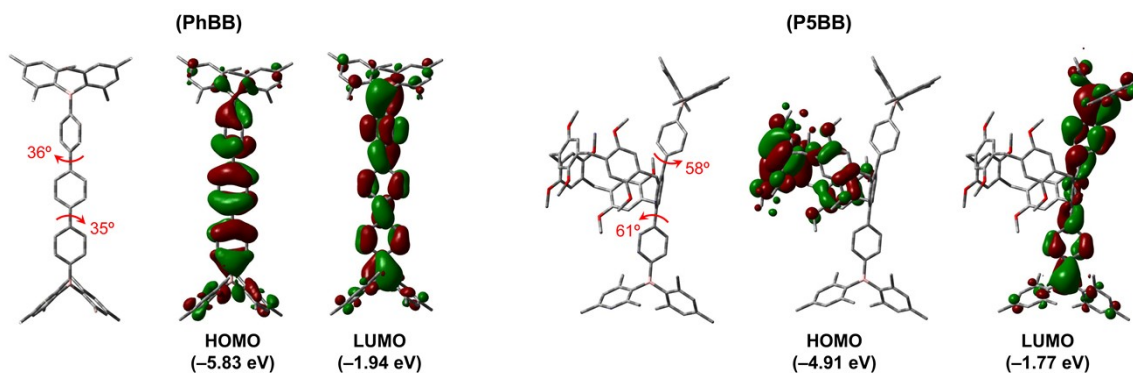

**Figure S14.** HOMO and LUMO distributions in **PhBB** (left) and **P5BB** (right), calculated with B3LYP/6-31G(d,p) method (iso = 0.02).

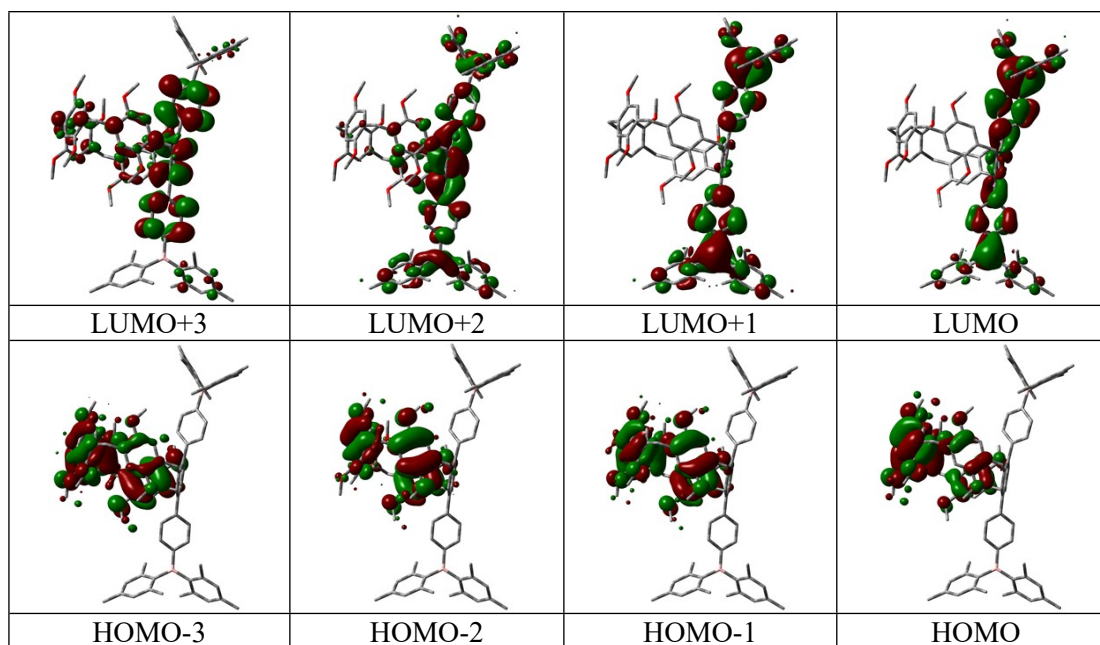

**Figure S15.** Molecular orbitals contributing to the DFT calculated transitions of **P5BB** (B3LYP/6-31G(p,d), iso = 0.02).

**Table S5.** Comparison of the TD-DFT calculations (B3LYP, 6-31G(d)) for **PhBB** and **P5BB**.

| Compound    | Transition            | $\lambda$ , nm (eV) | Oscillator Strength, $f$ | Orbital Contributions                                                                                     |
|-------------|-----------------------|---------------------|--------------------------|-----------------------------------------------------------------------------------------------------------|
| <b>PhBB</b> | $S_0 \rightarrow S_1$ | 367 (3.38)          | 1.2994                   | HOMO $\rightarrow$ LUMO (87%)                                                                             |
|             | $S_0 \rightarrow S_2$ | 361 (3.43)          | 0.0706                   | HOMO-1 $\rightarrow$ LUMO (73%)<br>HOMO-1 $\rightarrow$ LUMO+1 (24%)                                      |
|             | $S_0 \rightarrow S_3$ | 361 (3.44)          | 0.0765                   | HOMO-2 $\rightarrow$ LUMO (73%)<br>HOMO-2 $\rightarrow$ LUMO+1 (25%)                                      |
|             | $S_0 \rightarrow S_4$ | 347 (3.57)          | 0.0040                   | HOMO-4 $\rightarrow$ LUMO+1 (14%)<br>HOMO-3 $\rightarrow$ LUMO (71%)<br>HOMO $\rightarrow$ LUMO+1 (11%)   |
|             | $S_0 \rightarrow S_5$ | 342 (3.63)          | 0.0959                   | HOMO-5 $\rightarrow$ LUMO+1 (10%)<br>HOMO-4 $\rightarrow$ LUMO (72%)<br>HOMO-3 $\rightarrow$ LUMO+1 (11%) |
| <b>P5BB</b> | $S_0 \rightarrow S_1$ | 441 (2.81)          | 0.0008                   | HOMO $\rightarrow$ LUMO (81%)                                                                             |
|             | $S_0 \rightarrow S_2$ | 432 (2.87)          | 0.0002                   | HOMO-1 $\rightarrow$ LUMO (78%)<br>HOMO $\rightarrow$ LUMO (11%)                                          |
|             | $S_0 \rightarrow S_3$ | 418 (2.96)          | 0.0016                   | HOMO-2 $\rightarrow$ LUMO (59%)<br>HOMO $\rightarrow$ LUMO+1 (27%)                                        |
|             | $S_0 \rightarrow S_4$ | 416 (2.98)          | 0.0001                   | HOMO-2 $\rightarrow$ LUMO (19%)<br>HOMO $\rightarrow$ LUMO+1 (63%)                                        |

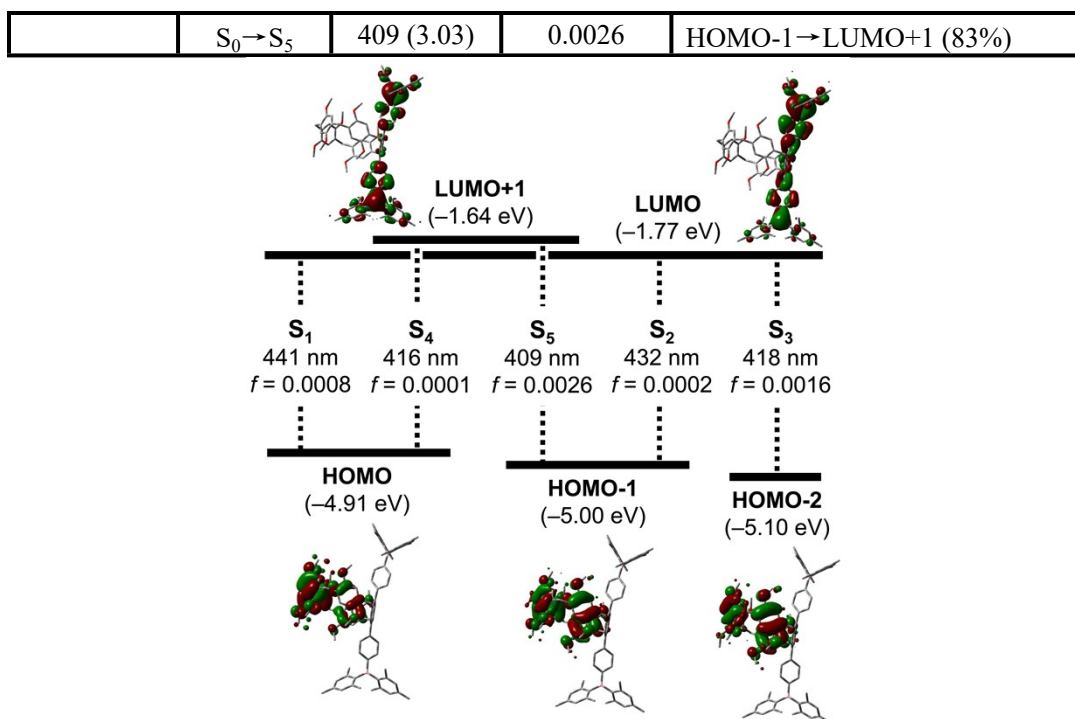

**Figure S16.** Key electronic transitions contributing to vertical excitations of **P5BB** (TD-DFT, B3LYP/6-31G(d)) as an example with molecular orbital plots (iso=0.02, DFT-B3LYP/6-31G(d,p)).

## 7. Electrochemical Measurements

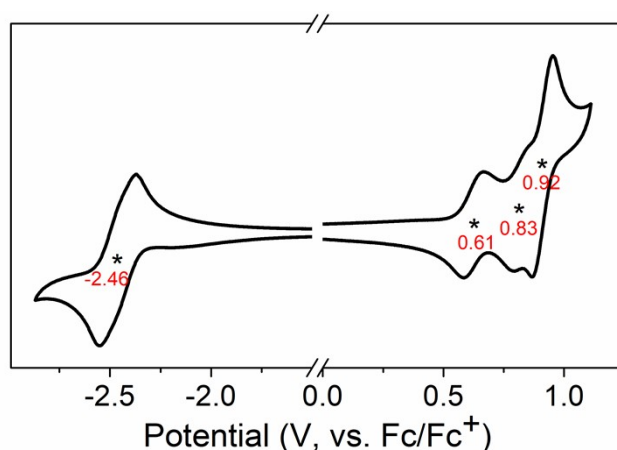

**Figure S17.** Cyclic voltammogram (CV) diagrams of *rac*-**P5BB** showing the reduction in THF and oxidation waves in  $\text{CH}_2\text{Cl}_2$  vs  $\text{Fc}/\text{Fc}^+$ , using  $n\text{-Bu}_4\text{NPF}_6$  (0.1 M) as the electrolyte,  $v = 100$  mV/s.

## 8. Chiral HPLC Trace Analysis

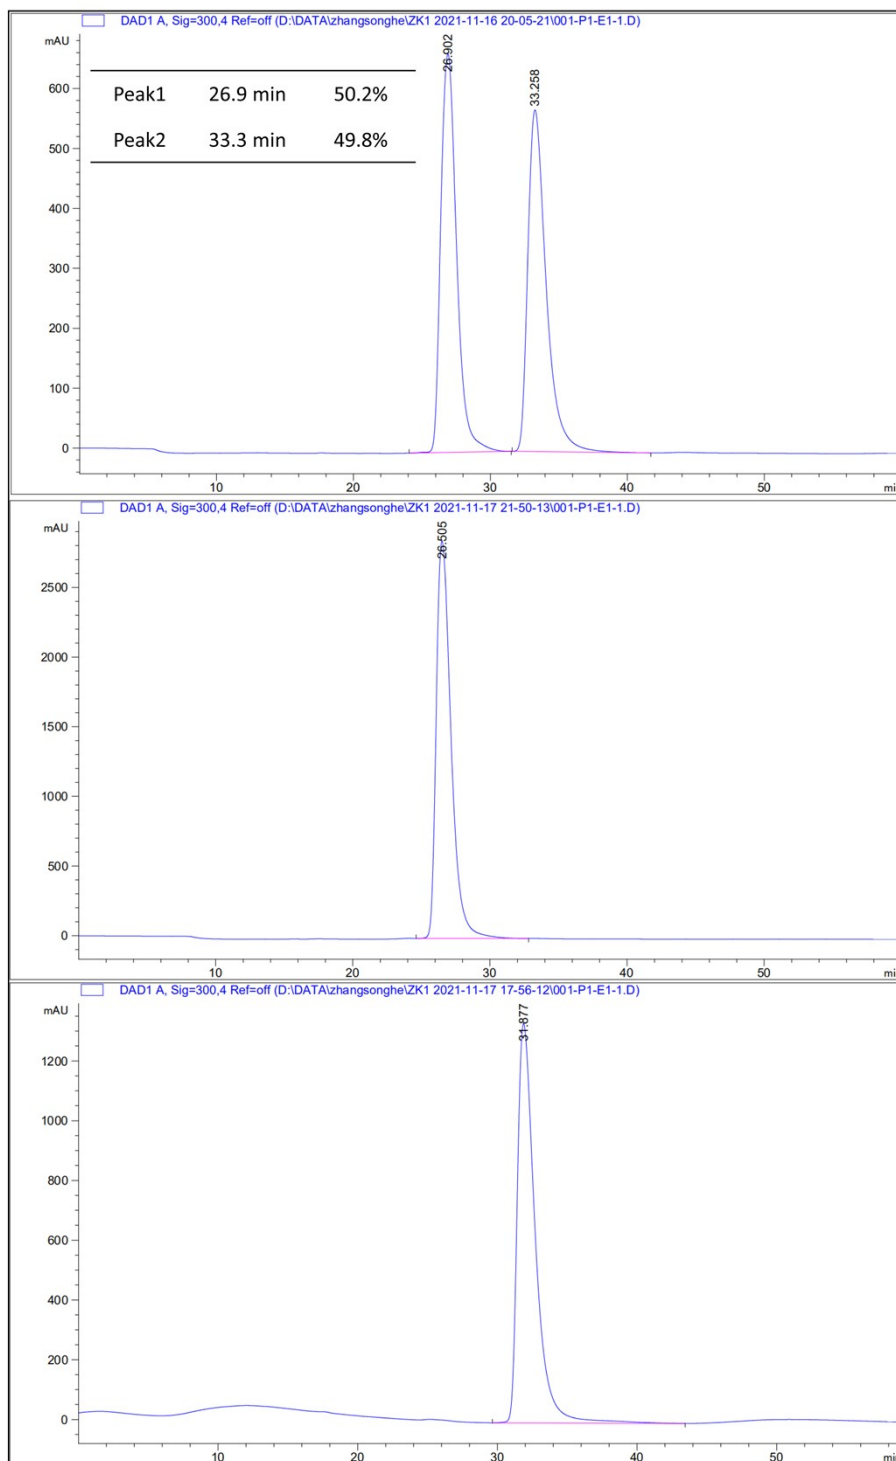

**Figure S18.** Chiral HPLC trace of **P5BB** (Daicel Chiralpak IB N-5 column, *n*-hexane/2-propanol = 96/4, flow rate = 1.0 mL/min,  $\lambda$  = 300 nm, at 30 °C).



**Table S6.** Summary of the HPLC analysis data of **P5BB**.

|                          | Fraction     | Retention time / min | Area / % | Enantiomeric excess (ee) | $[\alpha] / ^\circ$<br>$T = 25\text{ }^\circ\text{C}$ ,<br>$\lambda = 589\text{ nm}$ |
|--------------------------|--------------|----------------------|----------|--------------------------|--------------------------------------------------------------------------------------|
| <i>rac</i> - <b>P5BB</b> | Peak1        | 26.9                 | 50.2     | ---                      | ---                                                                                  |
|                          | Peak2        | 33.3                 | 49.8     | ---                      | ---                                                                                  |
| Enantiopure <b>P5BB</b>  | Single Peak1 | 26.5                 | >99      | >99%                     | -133                                                                                 |
|                          | Single Peak2 | 31.9                 | >99      | >99%                     | +130                                                                                 |

## 9. Host–Guest Recognition

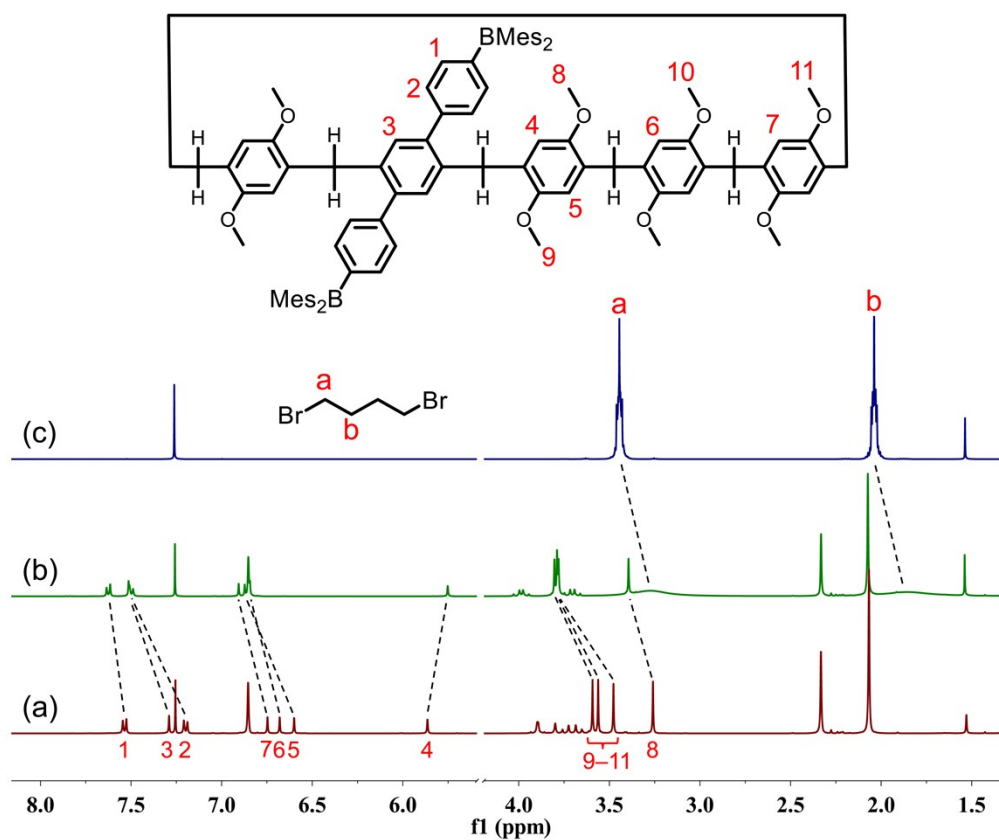

**Figure S19.** Partial  $^1\text{H}$  NMR spectra (400 MHz,  $\text{CDCl}_3$ , 298 K) recorded for the host–guest recognition of **P5BB** and 1,4-dibromobutane: (a) 6 mM **P5BB**, (b) 6 mM **P5BB** + 60 mM 1,4-dibromobutane, and (c) 60 mM 1,4-dibromobutane as a neutral guest molecule.

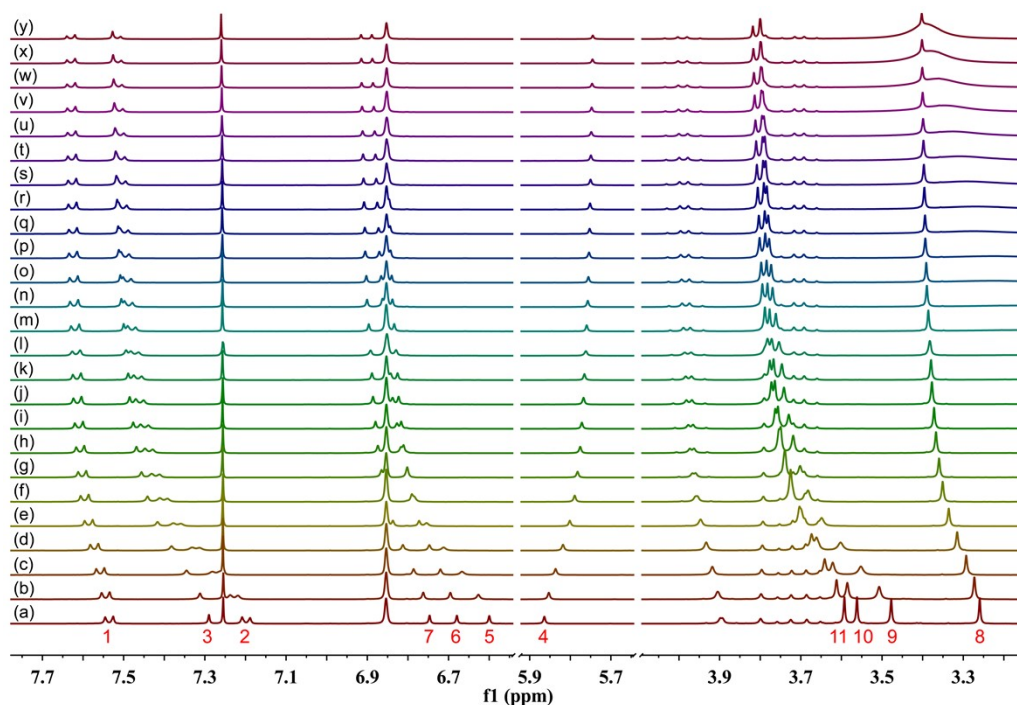

**Figure S20.** Partial  $^1\text{H}$  NMR spectra (400 MHz,  $\text{CDCl}_3$ , 298 K) of **P5BB** at a concentration of 6.0 mM with different concentrations of 1,4-dibromobutane as a guest molecule: (a) 0.0 mM, (b) 1.2 mM, (c) 3.0 mM, (d) 6.0 mM, (e) 9.0 mM, (f) 12 mM, (g) 15 mM, (h) 18 mM, (i) 21 mM, (j) 24 mM, (k) 27 mM, (l) 30 mM, (m) 36 mM, (n) 42 mM, (o) 48 mM, (p) 54 mM, (q) 60 mM, (r) 66 mM, (s) 75 mM, (t) 84 mM, (u) 96 mM, (v) 114 mM, (w) 138 mM, (x) 168 mM, and (y) 204 mM.

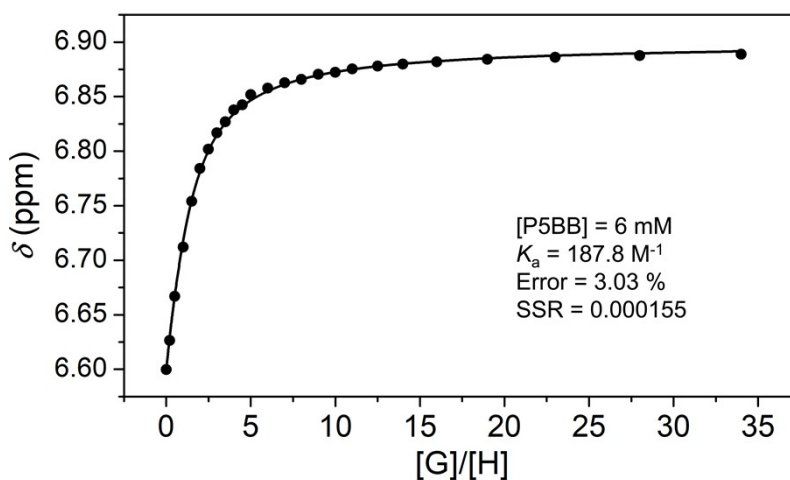

**Figure S21.** The chemical shift changes of  $\text{H}_5$  on **P5BB** upon addition of different equiv. of 1,4-dibromobutane. The black solid line was fitted using Bindfit software.<sup>[S7]</sup>

## 10. Anion Recognition

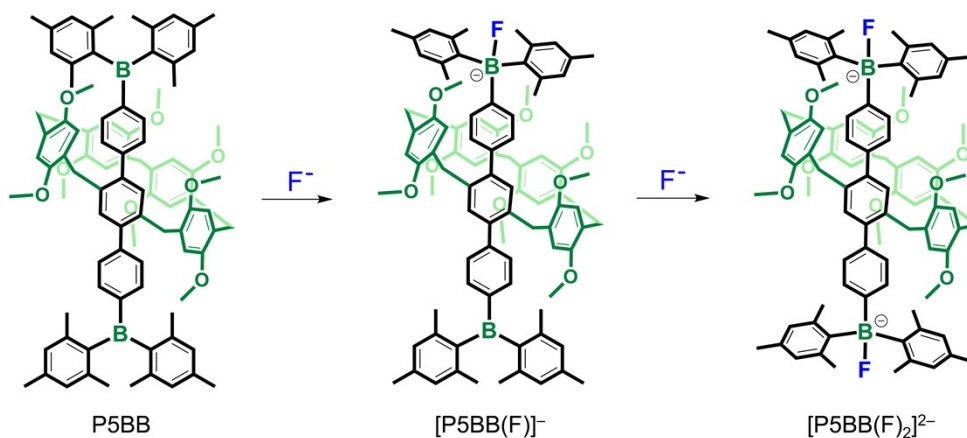

**Scheme S1.** Chemical structure of **P5BB** and the corresponding fluoride ion complexes.

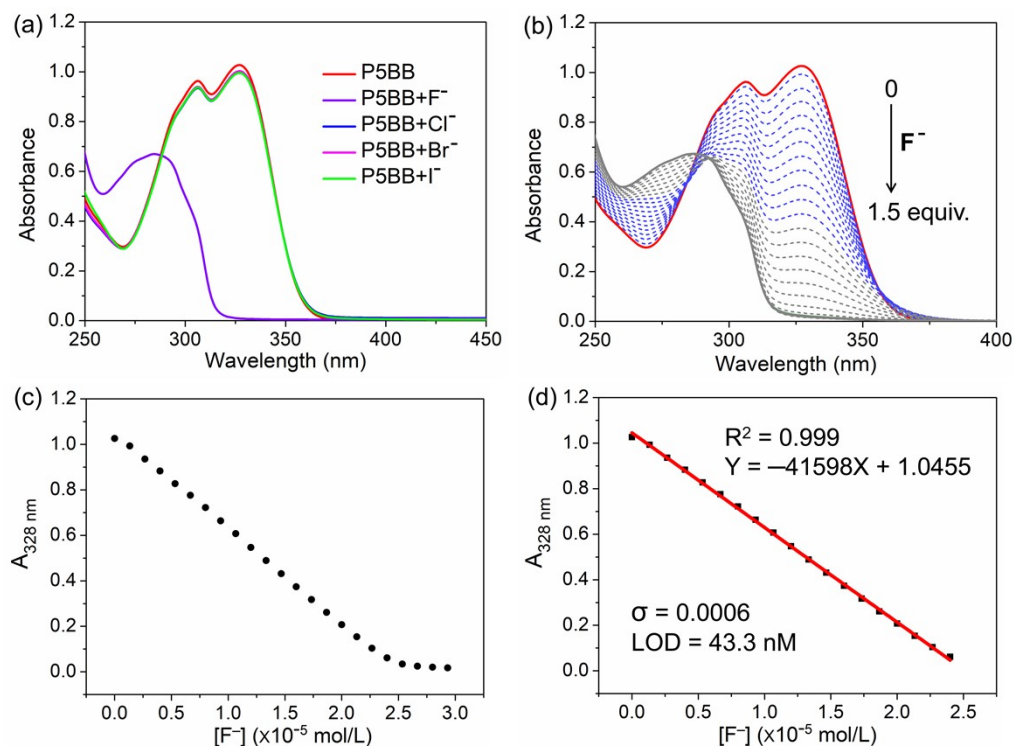

**Figure S22.** (a) UV-vis absorption of *rac*-**P5BB** (2.0 × 10<sup>-5</sup> M) to various solutions of anions (5.0 × 10<sup>-5</sup> M) as the tetrabutylammonium salts, in THF solution; (b) UV-vis absorption spectra with the addition of different concentrations of F<sup>-</sup> to *rac*-**P5BB** in THF solution; (c) Plot of absorption at 328 nm *versus* number of equivalents of F<sup>-</sup>; (d) Linear fitting of the absorption data upon addition of F<sup>-</sup>.

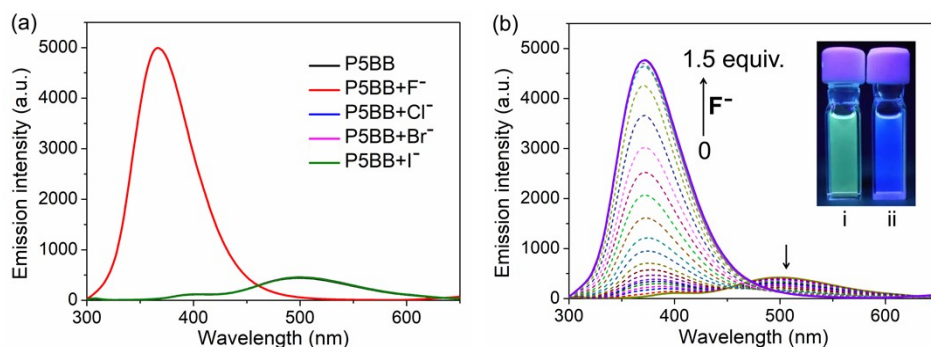

**Figure S23.** (a) Fluorescence responses of *rac*-**P5BB** ( $c = 2.0 \times 10^{-5}$  M,  $\lambda_{\text{ex}} = 306$  nm) to various solutions of anions ( $5.0 \times 10^{-5}$  M) as the tetrabutylammonium salts, in THF solution; (b) Fluorescence spectra with the addition of different concentrations of  $\text{F}^-$  to *rac*-**P5BB** in THF solution. Inset: photographs of solutions before (i) and after (ii) the addition of  $\text{F}^-$  under 365 nm UV irradiation.

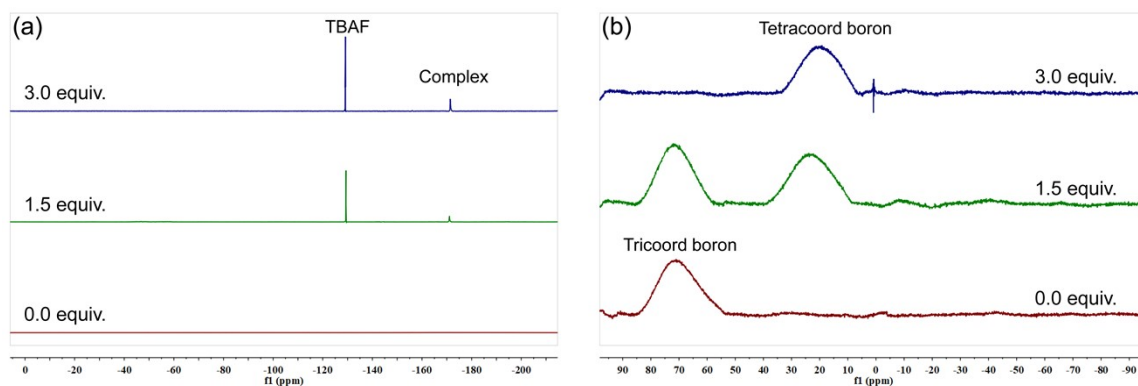

**Figure S24.** (a)  $^{19}\text{F}$  NMR and (b)  $^{11}\text{B}$  NMR spectroscopy stacked plot of **P5BB** in the presence different equivalent  $\text{F}^-$  in  $\text{CDCl}_3$ .

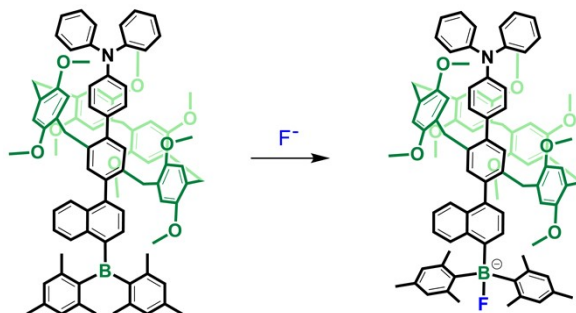

**Scheme S2.** Chemical structure of chiral pillar[5]arene derivative with a 1,4-naphthylene spacer and the corresponding fluoride ion complexes.

## 11. Coordinates (Å) for the Optimized Structures

**Table S7.** Coordinates (Å) for the optimized structure (B3LYP, 6-31G(d,p)) of **PhBB**.

| atom | X          | Y         | Z         | atom | X          | Y         | Z         |
|------|------------|-----------|-----------|------|------------|-----------|-----------|
| C    | -5.020903  | 1.185570  | 0.191845  | H    | -5.552600  | 2.118272  | 0.359994  |
| C    | -3.630415  | 1.192243  | 0.178753  | H    | -3.095944  | 2.122417  | 0.348051  |
| C    | -2.904345  | 0.001383  | -0.005403 | H    | -3.096814  | -2.119541 | -0.359032 |
| C    | -3.630895  | -1.189214 | -0.189343 | H    | -5.553501  | -2.114734 | -0.368681 |
| C    | -5.021387  | -1.182156 | -0.201168 | H    | -10.418383 | -3.619353 | -0.311682 |
| C    | -5.763330  | 0.001774  | -0.004110 | H    | -8.363104  | -2.530302 | -3.902720 |
| B    | -7.332425  | 0.001672  | -0.001803 | H    | -8.350183  | 2.531997  | 3.903283  |
| C    | -1.422261  | 0.001030  | -0.005152 | H    | -10.413502 | 3.626035  | 0.318175  |
| C    | -8.096263  | 1.148035  | 0.782192  | H    | -11.206189 | -4.446642 | -2.584126 |
| C    | -8.098268  | -1.145815 | -0.782300 | H    | -9.670315  | -5.289887 | -2.778599 |
| C    | -9.051237  | -1.975638 | -0.129446 | H    | -10.199882 | -4.141793 | -4.010160 |
| C    | -9.700810  | -2.991390 | -0.836044 | H    | -9.868627  | 4.367659  | 3.988449  |
| C    | -9.467543  | -3.216567 | -2.195113 | H    | -11.280642 | 4.122647  | 2.951869  |
| C    | -8.547710  | -2.389397 | -2.839458 | H    | -10.040471 | 5.282520  | 2.483590  |
| C    | -7.854064  | -1.379881 | -2.161877 | H    | -8.495534  | 1.997508  | -1.971979 |
| C    | -7.848217  | 1.380338  | 2.160325  | H    | -10.132875 | 2.559276  | -1.643993 |
| C    | -8.540615  | 2.389694  | 2.841318  | H    | -9.752909  | 0.832517  | -1.575773 |
| C    | -9.464235  | 3.214885  | 2.202017  | H    | -9.769550  | -0.825150 | 1.570326  |
| C    | -9.698193  | 2.994292  | 0.841310  | H    | -8.498293  | -1.971487 | 1.975677  |
| C    | -9.050408  | 1.980416  | 0.132214  | H    | -10.127972 | -2.556006 | 1.649521  |
| C    | -10.175272 | -4.327808 | -2.932475 | H    | -1.225746  | -1.905881 | 0.985498  |
| C    | -10.199086 | 4.302566  | 2.948156  | H    | 1.226796   | -1.920593 | 0.958649  |
| C    | -9.375695  | 1.831191  | -1.340290 | H    | 1.228493   | 1.921602  | -0.966362 |
| C    | -9.379530  | -1.820577 | 1.341849  | H    | -1.224047  | 1.907848  | -0.995653 |
| C    | -0.694302  | -1.070286 | 0.540429  | H    | 3.098119   | -0.960052 | 1.921252  |
| C    | 0.696122   | -1.069611 | 0.542876  | H    | 5.554423   | -1.006665 | 1.896620  |
| C    | 1.424999   | 0.000499  | -0.003700 | H    | 5.557514   | 1.006616  | -1.897991 |
| C    | 0.697074   | 1.070813  | -0.551145 | H    | 3.101233   | 0.960655  | -1.926305 |
| C    | -0.693366  | 1.072017  | -0.550113 | H    | 8.348170   | -4.516931 | 1.122619  |
| C    | 2.907444   | 0.000310  | -0.002675 | H    | 10.420815  | -1.485482 | 3.318410  |
| C    | 3.632869   | -0.554069 | 1.067630  | H    | 8.350691   | 4.516354  | -1.119514 |
| C    | 5.023405   | -0.564871 | 1.057745  | H    | 10.425935  | 1.484640  | -3.312486 |
| C    | 5.766349   | -0.000064 | -0.000531 | H    | 10.188960  | -5.150122 | 2.605264  |
| C    | 5.025129   | 0.564946  | -1.059921 | H    | 9.658415   | -4.362610 | 4.093103  |
| C    | 3.634601   | 0.554515  | -1.071889 | H    | 11.196331  | -3.905026 | 3.362860  |
| B    | 7.335814   | -0.000213 | 0.000674  | H    | 10.192860  | 5.149529  | -2.600036 |
| C    | 8.098940   | -1.114741 | 0.829468  | H    | 9.665587   | 4.361171  | -4.088603 |
| C    | 8.100371   | 1.114201  | -0.826943 | H    | 11.202157  | 3.904410  | -3.355052 |
| C    | 7.847497   | -2.494080 | 0.602552  | H    | 6.795774   | 2.329626  | 1.311640  |
| C    | 8.537830   | -3.466553 | 1.335372  | H    | 5.850263   | 3.065577  | 0.031087  |
| C    | 9.460917   | -3.130712 | 2.325569  | H    | 7.149574   | 3.981865  | 0.798758  |
| C    | 9.701024   | -1.773404 | 2.554724  | H    | 9.775388   | 1.207580  | 1.285839  |
| C    | 9.055274   | -0.771750 | 1.825041  | H    | 10.145312  | 0.717672  | 2.945449  |
| C    | 7.848862   | 2.493557  | -0.600302 | H    | 8.513519   | 1.221226  | 2.511329  |
| C    | 8.540447   | 3.465954  | -1.332069 | H    | 10.149275  | -0.718551 | -2.940173 |
| C    | 9.464870   | 3.130003  | -2.320959 | H    | 8.516903   | -1.221862 | -2.507940 |

|   |           |           |           |   |           |           |           |
|---|-----------|-----------|-----------|---|-----------|-----------|-----------|
| C | 9.705069  | 1.772648  | -2.549846 | H | 9.777325  | -1.208271 | -1.280958 |
| C | 9.058097  | 0.771089  | -1.821150 | H | 5.849613  | -3.065255 | -0.031860 |
| C | 10.165250 | -4.193122 | 3.134631  | H | 6.797593  | -2.330249 | -1.311140 |
| C | 10.170529 | 4.192289  | -3.129024 | H | 7.149676  | -3.982498 | -0.797128 |
| C | 6.862662  | 2.987756  | 0.442741  | H | -5.846743 | 0.961225  | 2.894694  |
| C | 9.390641  | 0.668700  | 2.155669  | H | -6.80704  | -0.484268 | 2.640133  |
| C | 9.393674  | -0.66942  | -2.151292 | H | -7.140207 | 0.557199  | 4.026345  |
| C | 6.862714  | -2.988120 | -0.441905 | H | -7.149630 | -0.561949 | -4.031534 |
| C | -6.861963 | 0.556113  | 2.968135  | H | -5.854722 | -0.950326 | -2.896003 |
| C | -6.872725 | -0.553079 | -2.973037 | H | -6.825955 | 0.489531  | -2.650666 |

**Table S8.** Coordinates (Å) for the optimized structure (B3LYP, 6-31G(d,p)) of **P5BB**.

| atom | X         | Y         | Z         | atom | X         | Y         | Z         |
|------|-----------|-----------|-----------|------|-----------|-----------|-----------|
| O    | -1.105628 | -0.646721 | 3.850852  | H    | 0.695395  | 2.192678  | -4.691800 |
| C    | 9.585727  | -6.951818 | 3.012300  | C    | -1.176886 | 2.711838  | -3.825267 |
| H    | 10.641447 | -6.692761 | 3.162694  | C    | -2.308253 | 2.221488  | -3.151664 |
| H    | 9.560256  | -7.942501 | 2.547858  | C    | -2.404391 | 0.863894  | -2.835682 |
| H    | 9.125564  | -7.028283 | 4.001868  | H    | -3.270868 | 0.482874  | -2.307933 |
| B    | 6.910586  | -2.842543 | -0.366485 | C    | 1.798677  | -0.048756 | -4.969265 |
| O    | 3.995848  | 1.511734  | 3.563888  | H    | 2.406731  | -0.936820 | -5.150745 |
| C    | 8.888003  | -5.922452 | 2.156188  | H    | 2.398815  | 0.693073  | -4.426419 |
| O    | -0.418637 | 4.464495  | 4.391856  | H    | 1.490358  | 0.380642  | -5.931393 |
| C    | 8.189099  | -4.858788 | 2.727386  | C    | -4.468490 | 2.683250  | -2.225838 |
| H    | 8.134944  | -4.781872 | 3.811691  | H    | -4.269322 | 2.237016  | -1.242764 |
| O    | 3.657260  | 5.843763  | 0.885678  | H    | -4.992220 | 1.946884  | -2.848807 |
| C    | 7.552452  | -3.885662 | 1.949037  | H    | -5.106449 | 3.559894  | -2.098203 |
| O    | -1.584741 | 6.922762  | -0.011352 | C    | -1.032044 | 4.192554  | -4.140963 |
| C    | 6.813879  | -2.785321 | 2.689123  | H    | -0.383833 | 4.305111  | -5.013903 |
| H    | 6.856509  | -1.825878 | 2.168672  | H    | -2.012685 | 4.601624  | -4.398732 |
| H    | 7.239112  | -2.643154 | 3.687297  | C    | -0.455698 | 4.991062  | -2.982182 |
| H    | 5.753243  | -3.029803 | 2.814694  | C    | 0.932103  | 5.097756  | -2.793619 |
| O    | 1.723948  | 4.487793  | -3.742390 | C    | 1.441140  | 5.793385  | -1.693962 |
| C    | 7.625000  | -3.938979 | 0.531489  | H    | 2.508647  | 5.860076  | -1.523797 |
| O    | -3.282217 | 3.145377  | -2.845920 | C    | 0.597565  | 6.397258  | -0.756518 |
| C    | 8.348089  | -5.016388 | -0.050591 | C    | -0.788946 | 6.306154  | -0.955034 |
| O    | 0.685522  | -0.484116 | -4.209132 | C    | -1.297780 | 5.613672  | -2.057012 |
| C    | 8.464759  | -5.189554 | -1.551114 | H    | -2.365467 | 5.515226  | -2.205047 |
| H    | 7.490511  | -5.384740 | -2.014489 | C    | 3.128775  | 4.608602  | -3.613509 |
| H    | 9.111704  | -6.037192 | -1.793141 | H    | 3.558813  | 4.084053  | -4.469043 |
| H    | 8.876880  | -4.299910 | -2.033665 | H    | 3.495019  | 4.147495  | -2.686981 |
| C    | 8.946388  | -5.983772 | 0.762045  | H    | 3.451216  | 5.657852  | -3.637304 |
| H    | 9.479872  | -6.806722 | 0.290706  | C    | -2.984243 | 6.930447  | -0.223577 |
| C    | 9.888320  | 0.401002  | -4.375235 | H    | -3.404943 | 5.916088  | -0.217282 |
| H    | 10.778368 | -0.141908 | -4.717639 | H    | -3.249452 | 7.416095  | -1.171861 |
| H    | 10.232863 | 1.352522  | -3.958142 | H    | -3.413605 | 7.500949  | 0.602353  |
| H    | 9.279904  | 0.617280  | -5.258402 | C    | 1.175283  | 7.085989  | 0.470057  |
| C    | 9.117436  | -0.402729 | -3.355683 | H    | 0.483938  | 7.862617  | 0.805578  |
| C    | 9.478209  | -0.391779 | -2.006050 | H    | 2.117206  | 7.569326  | 0.200411  |
| H    | 10.310683 | 0.231578  | -1.685726 | C    | 1.421672  | 6.109625  | 1.609718  |
| C    | 8.810141  | -1.165431 | -1.052850 | C    | 2.666896  | 5.482719  | 1.775464  |

|   |            |           |           |   |            |           |           |
|---|------------|-----------|-----------|---|------------|-----------|-----------|
| C | 9.278358   | -1.071014 | 0.384865  | C | 2.851887   | 4.544882  | 2.794707  |
| H | 8.522293   | -0.605459 | 1.028551  | H | 3.800710   | 4.038044  | 2.917789  |
| H | 10.183076  | -0.461288 | 0.458591  | C | 1.815168   | 4.197133  | 3.665320  |
| H | 9.496703   | -2.054764 | 0.807657  | C | 0.572661   | 4.831712  | 3.506137  |
| C | 7.705814   | -1.976410 | -1.433181 | C | 0.390104   | 5.775827  | 2.492327  |
| C | 7.328828   | -1.976044 | -2.802519 | H | -0.569918  | 6.255051  | 2.345163  |
| C | 6.172500   | -2.802240 | -3.336765 | C | 4.949454   | 5.295060  | 1.069788  |
| H | 6.005592   | -3.719558 | -2.769049 | H | 5.360958   | 5.545656  | 2.056314  |
| H | 6.352929   | -3.083038 | -4.379011 | H | 5.580286   | 5.737809  | 0.296522  |
| H | 5.231999   | -2.240645 | -3.305405 | H | 4.950765   | 4.203177  | 0.954113  |
| C | 8.042080   | -1.208057 | -3.730519 | C | -1.665371  | 5.130038  | 4.307777  |
| H | 7.746699   | -1.243168 | -4.777611 | H | -1.559237  | 6.213138  | 4.452868  |
| C | 5.367226   | -2.612177 | -0.209538 | H | -2.282683  | 4.721210  | 5.110146  |
| C | 4.521381   | -3.608309 | 0.324587  | H | -2.160726  | 4.950013  | 3.344570  |
| H | 4.957371   | -4.547908 | 0.653174  | C | 2.023323   | 3.127293  | 4.725840  |
| C | 3.143254   | -3.433716 | 0.411892  | H | 1.370821   | 3.333737  | 5.577576  |
| H | 2.517975   | -4.239921 | 0.785219  | H | 3.057080   | 3.170519  | 5.077693  |
| C | 2.539272   | -2.236909 | -0.011953 | C | 1.732383   | 1.727821  | 4.206584  |
| C | 3.368896   | -1.226205 | -0.527899 | C | 2.737867   | 0.951635  | 3.608259  |
| H | 2.919906   | -0.291822 | -0.852044 | C | 2.438414   | -0.315797 | 3.099830  |
| C | 4.744607   | -1.416533 | -0.630071 | H | 3.210824   | -0.913984 | 2.632326  |
| H | 5.358518   | -0.623857 | -1.049835 | C | 1.145465   | -0.844653 | 3.161903  |
| C | 1.055543   | -2.076540 | -0.007239 | C | 0.145028   | -0.075330 | 3.779202  |
| C | 0.259434   | -2.141807 | 1.157528  | C | 0.444567   | 1.191151  | 4.288699  |
| C | -1.127093  | -2.085051 | 0.999573  | H | -0.325023  | 1.801634  | 4.744413  |
| H | -1.745955  | -2.158084 | 1.887283  | C | 5.060096   | 0.723829  | 3.059221  |
| C | -1.758813  | -1.945570 | -0.246685 | H | 5.958811   | 1.337520  | 3.146884  |
| C | -0.959221  | -1.804672 | -1.400535 | H | 4.907244   | 0.453777  | 2.006611  |
| C | 0.428778   | -1.883871 | -1.245487 | H | 5.195196   | -0.195524 | 3.643536  |
| H | 1.047176   | -1.799360 | -2.133308 | C | -2.129655  | 0.066762  | 4.520603  |
| C | -3.249722  | -1.984239 | -0.263404 | H | -1.870966  | 0.259850  | 5.569950  |
| C | -3.949851  | -2.954385 | -1.003138 | H | -3.016687  | -0.568045 | 4.480693  |
| H | -3.392842  | -3.663782 | -1.608548 | H | -2.348950  | 1.023549  | 4.029010  |
| C | -5.335976  | -3.047545 | -0.926854 | C | 0.839516   | -2.212805 | 2.568240  |
| H | -5.844924  | -3.828248 | -1.485754 | H | 0.123146   | -2.729366 | 3.213305  |
| C | -6.100917  | -2.166315 | -0.132957 | H | 1.759429   | -2.801230 | 2.570792  |
| C | -5.386595  | -1.182637 | 0.583896  | C | -6.872920  | -4.833256 | 1.495510  |
| H | -5.937911  | -0.478979 | 1.202474  | H | -5.869083  | -4.984162 | 1.083368  |
| C | -3.997133  | -1.100940 | 0.535715  | H | -6.848330  | -3.885733 | 2.037641  |
| H | -3.472678  | -0.346914 | 1.116020  | H | -7.051328  | -5.629758 | 2.224310  |
| C | -8.327480  | -3.708327 | -0.315466 | C | -9.819937  | -2.700510 | -2.148789 |
| C | -7.929763  | -4.866117 | 0.406003  | H | -10.136204 | -1.852591 | -1.536537 |
| C | -8.533414  | -6.101575 | 0.145219  | H | -9.034339  | -2.337718 | -2.822580 |
| H | -8.230411  | -6.967072 | 0.731437  | H | -10.664810 | -3.001164 | -2.774461 |
| C | -9.510324  | -6.256385 | -0.838486 | C | -10.118591 | -7.606143 | -1.134188 |
| C | -9.895457  | -5.119470 | -1.552688 | H | -9.593829  | -8.105012 | -1.958862 |
| H | -10.660576 | -5.211205 | -2.320992 | H | -10.063683 | -8.269429 | -0.265949 |
| C | -9.337960  | -3.862034 | -1.304237 | H | -11.169038 | -7.516631 | -1.428264 |
| C | -8.512603  | -1.027193 | 0.394554  | C | -7.588968  | 0.300446  | -1.607656 |
| C | -9.360789  | -1.042138 | 1.534624  | H | -7.934994  | 1.131281  | -2.229790 |
| C | -10.087694 | 0.099553  | 1.886794  | H | -6.541361  | 0.488575  | -1.350090 |

|   |            |           |           |   |            |           |           |
|---|------------|-----------|-----------|---|------------|-----------|-----------|
| H | -10.723811 | 0.064294  | 2.768959  | H | -7.600258  | -0.601558 | -2.224691 |
| C | -10.033420 | 1.275272  | 1.135600  | C | -9.488805  | -2.261378 | 2.424554  |
| C | -9.214300  | 1.283438  | 0.005510  | H | -9.783607  | -3.149045 | 1.859425  |
| H | -9.170212  | 2.179993  | -0.609993 | H | -8.543094  | -2.499376 | 2.925560  |
| C | -8.449525  | 0.172031  | -0.364540 | H | -10.234371 | -2.093340 | 3.206584  |
| C | -1.520258  | -1.508626 | -2.789203 | C | -10.819172 | 2.498648  | 1.542446  |
| H | -0.988064  | -2.117128 | -3.525467 | H | -10.255826 | 3.113092  | 2.256345  |
| H | -2.573925  | -1.787729 | -2.837949 | H | -11.049529 | 3.132018  | 0.680559  |
| C | -1.394776  | -0.041889 | -3.176451 | H | -11.762423 | 2.226381  | 2.025950  |
| C | -0.274749  | 0.444567  | -3.868877 | B | -7.659780  | -2.299480 | -0.021842 |
| C | -0.176521  | 1.803996  | -4.181169 |   |            |           |           |

## References:

- [S1] X. Li, Z. Li, Y.-W. Yang, *Adv. Mater.* **2018**, *30*, 1800177.
- [S2] X. Xu, S. Ye, B. He, B. Chen, J. Xiang, J. Zhou, P. Lu, Z. Zhao, H. Qiu, *Dyes Pigm.* **2014**, *101*, 136–141.
- [S3] Y.-J. Na, W. Song, J. Y. Lee, S.-H. Hwang, *Dalton Trans.* **2015**, *44*, 8360–8363.
- [S4] M. J. Frisch, G. W. Trucks, H. B. Schlegel, G. E. Scuseria, M. A. Robb, J. R. Cheeseman, G. Scalmani, V. Barone, B. Mennucci, G. A. H. Petersson, M. Nakatsuji, X. Caricato, H. P. F. Li, A. Hratchian, J. Izmaylov, G. Bloino, J. L. Zheng, M. Sonnenberg, M. Hada, K. Ehara, R. Toyota, J. Fukuda, M. Hasegawa, T. Ishida, Y. Nakajima, O. Honda, H. Kitao, T. Nakai, J. A. Vreven, J. E. Montgomery Jr., F. Peralta, M. Ogliaro, J. J. Bearpark, E. Heyd, K. N. Brothers, V. N. Kudin, T. Staroverov, R. Keith, J. Kobayashi, K. Normand, A. Raghavachari, J. C. Rendell, S. S. Burant, J. Iyengar, M. Tomasi, N. Cossi, J. M. Rega, M. Millam, J. E. Klene, J. B. Knox, V. Cross, C. Bakken, J. Adamo, R. Jaramillo, R. E. Gomperts, O. Stratmann, A. J. Yazyev, R. Austin, C. Cammi, J. W. Pomelli, R. L. Ochterski, K. Martin, V. G. Morokuma, G. A. Zakrzewski, P. Voth, J. J. Salvador, S. Dannenberg, A. D. Dapprich, O. Daniels, J. B. Farkas, J. V. Foresman, J. Ortiz, J. Cioslowski, D. J. Fox, Gaussian 09 Revision C.01, 2010.
- [S5] (a) C. Lee, W. Yang, R. G. Parr, *Phys. Rev. B*, **1988**, *37*, 785–789; (b) A. D. Becke, *J. Chem. Phys.* **1993**, *98*, 1372–1377; (c) A. D. Becke, *J. Chem. Phys.* **1993**, *98*, 5648–5652.
- [S6] (a) R. Ditchfield, W. J. Hehre, J. A. Pople, *J. Chem. Phys.* **1971**, *54*, 724–728; (b) A. D. McLean, G. S. Chandler, *J. Chem. Phys.* **1980**, *72*, 5639–5648.
- [S7] The binding constant  $K$  is determined with the online tools at <http://supramolecular.org>.
